# Supplementary material
Source: ML conference proceedings conference paper supplement (https://openreview.net/forum?id=dAxd_CTzKN)
Supplement: supplementary_material [file attachment]

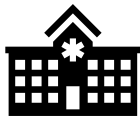

Data Owner1 Feature Set 1

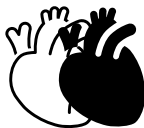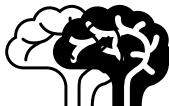

Feature Set 2

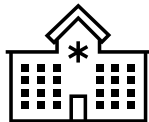

Data Owner2

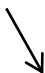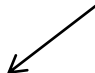

|          | Feature Set 1                                                                                                               | Feature Set 2 |  |  |  |  |  |  |  |  |                                                                                                                             |  |  |  |  |  |  |  |  |  |
|----------|-----------------------------------------------------------------------------------------------------------------------------|---------------|--|--|--|--|--|--|--|--|-----------------------------------------------------------------------------------------------------------------------------|--|--|--|--|--|--|--|--|--|
| Entity 1 | <table><tr><td></td><td></td><td></td></tr><tr><td></td><td></td><td></td></tr><tr><td></td><td></td><td></td></tr></table> |               |  |  |  |  |  |  |  |  | <table><tr><td></td><td></td><td></td></tr><tr><td></td><td></td><td></td></tr><tr><td></td><td></td><td></td></tr></table> |  |  |  |  |  |  |  |  |  |
|          |                                                                                                                             |               |  |  |  |  |  |  |  |  |                                                                                                                             |  |  |  |  |  |  |  |  |  |
|          |                                                                                                                             |               |  |  |  |  |  |  |  |  |                                                                                                                             |  |  |  |  |  |  |  |  |  |
|          |                                                                                                                             |               |  |  |  |  |  |  |  |  |                                                                                                                             |  |  |  |  |  |  |  |  |  |
|          |                                                                                                                             |               |  |  |  |  |  |  |  |  |                                                                                                                             |  |  |  |  |  |  |  |  |  |
|          |                                                                                                                             |               |  |  |  |  |  |  |  |  |                                                                                                                             |  |  |  |  |  |  |  |  |  |
|          |                                                                                                                             |               |  |  |  |  |  |  |  |  |                                                                                                                             |  |  |  |  |  |  |  |  |  |
| Entity 2 | <table><tr><td></td><td></td><td></td></tr><tr><td></td><td></td><td></td></tr><tr><td></td><td></td><td></td></tr></table> |               |  |  |  |  |  |  |  |  | <table><tr><td></td><td></td><td></td></tr><tr><td></td><td></td><td></td></tr><tr><td></td><td></td><td></td></tr></table> |  |  |  |  |  |  |  |  |  |
|          |                                                                                                                             |               |  |  |  |  |  |  |  |  |                                                                                                                             |  |  |  |  |  |  |  |  |  |
|          |                                                                                                                             |               |  |  |  |  |  |  |  |  |                                                                                                                             |  |  |  |  |  |  |  |  |  |
|          |                                                                                                                             |               |  |  |  |  |  |  |  |  |                                                                                                                             |  |  |  |  |  |  |  |  |  |
|          |                                                                                                                             |               |  |  |  |  |  |  |  |  |                                                                                                                             |  |  |  |  |  |  |  |  |  |
|          |                                                                                                                             |               |  |  |  |  |  |  |  |  |                                                                                                                             |  |  |  |  |  |  |  |  |  |
|          |                                                                                                                             |               |  |  |  |  |  |  |  |  |                                                                                                                             |  |  |  |  |  |  |  |  |  |
| Entity 3 | <table><tr><td></td><td></td><td></td></tr><tr><td></td><td></td><td></td></tr><tr><td></td><td></td><td></td></tr></table> |               |  |  |  |  |  |  |  |  | <table><tr><td></td><td></td><td></td></tr><tr><td></td><td></td><td></td></tr><tr><td></td><td></td><td></td></tr></table> |  |  |  |  |  |  |  |  |  |
|          |                                                                                                                             |               |  |  |  |  |  |  |  |  |                                                                                                                             |  |  |  |  |  |  |  |  |  |
|          |                                                                                                                             |               |  |  |  |  |  |  |  |  |                                                                                                                             |  |  |  |  |  |  |  |  |  |
|          |                                                                                                                             |               |  |  |  |  |  |  |  |  |                                                                                                                             |  |  |  |  |  |  |  |  |  |
|          |                                                                                                                             |               |  |  |  |  |  |  |  |  |                                                                                                                             |  |  |  |  |  |  |  |  |  |
|          |                                                                                                                             |               |  |  |  |  |  |  |  |  |                                                                                                                             |  |  |  |  |  |  |  |  |  |
|          |                                                                                                                             |               |  |  |  |  |  |  |  |  |                                                                                                                             |  |  |  |  |  |  |  |  |  |

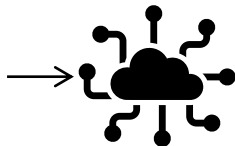

Model
