# Supplementary material
Source: ML conference proceedings conference paper supplement (https://openreview.net/forum?id=dAxd_CTzKN)

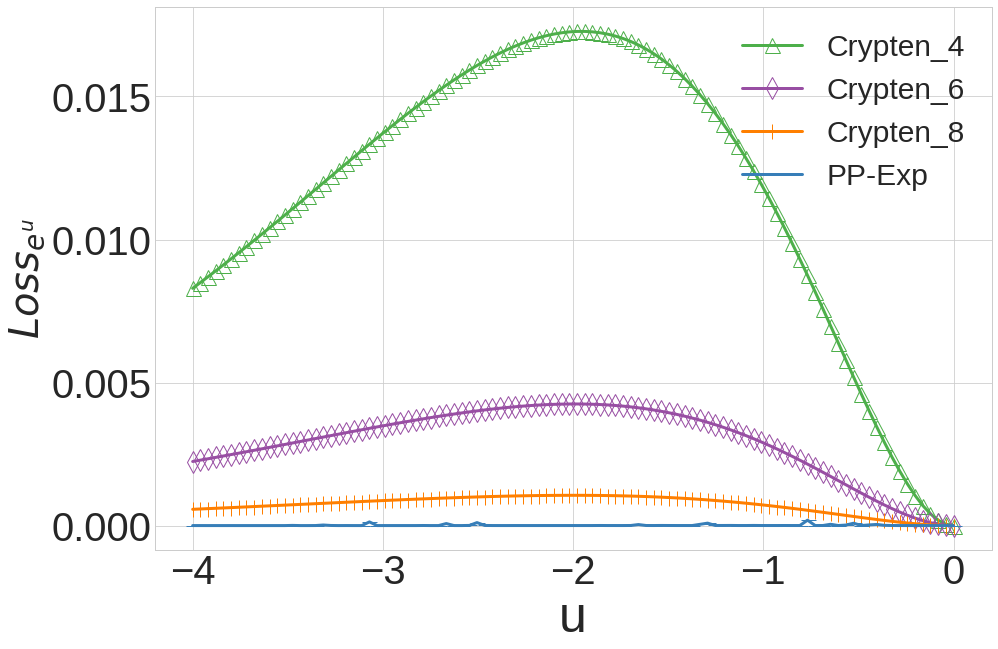

Supplement: supplementary_material [file attachment]

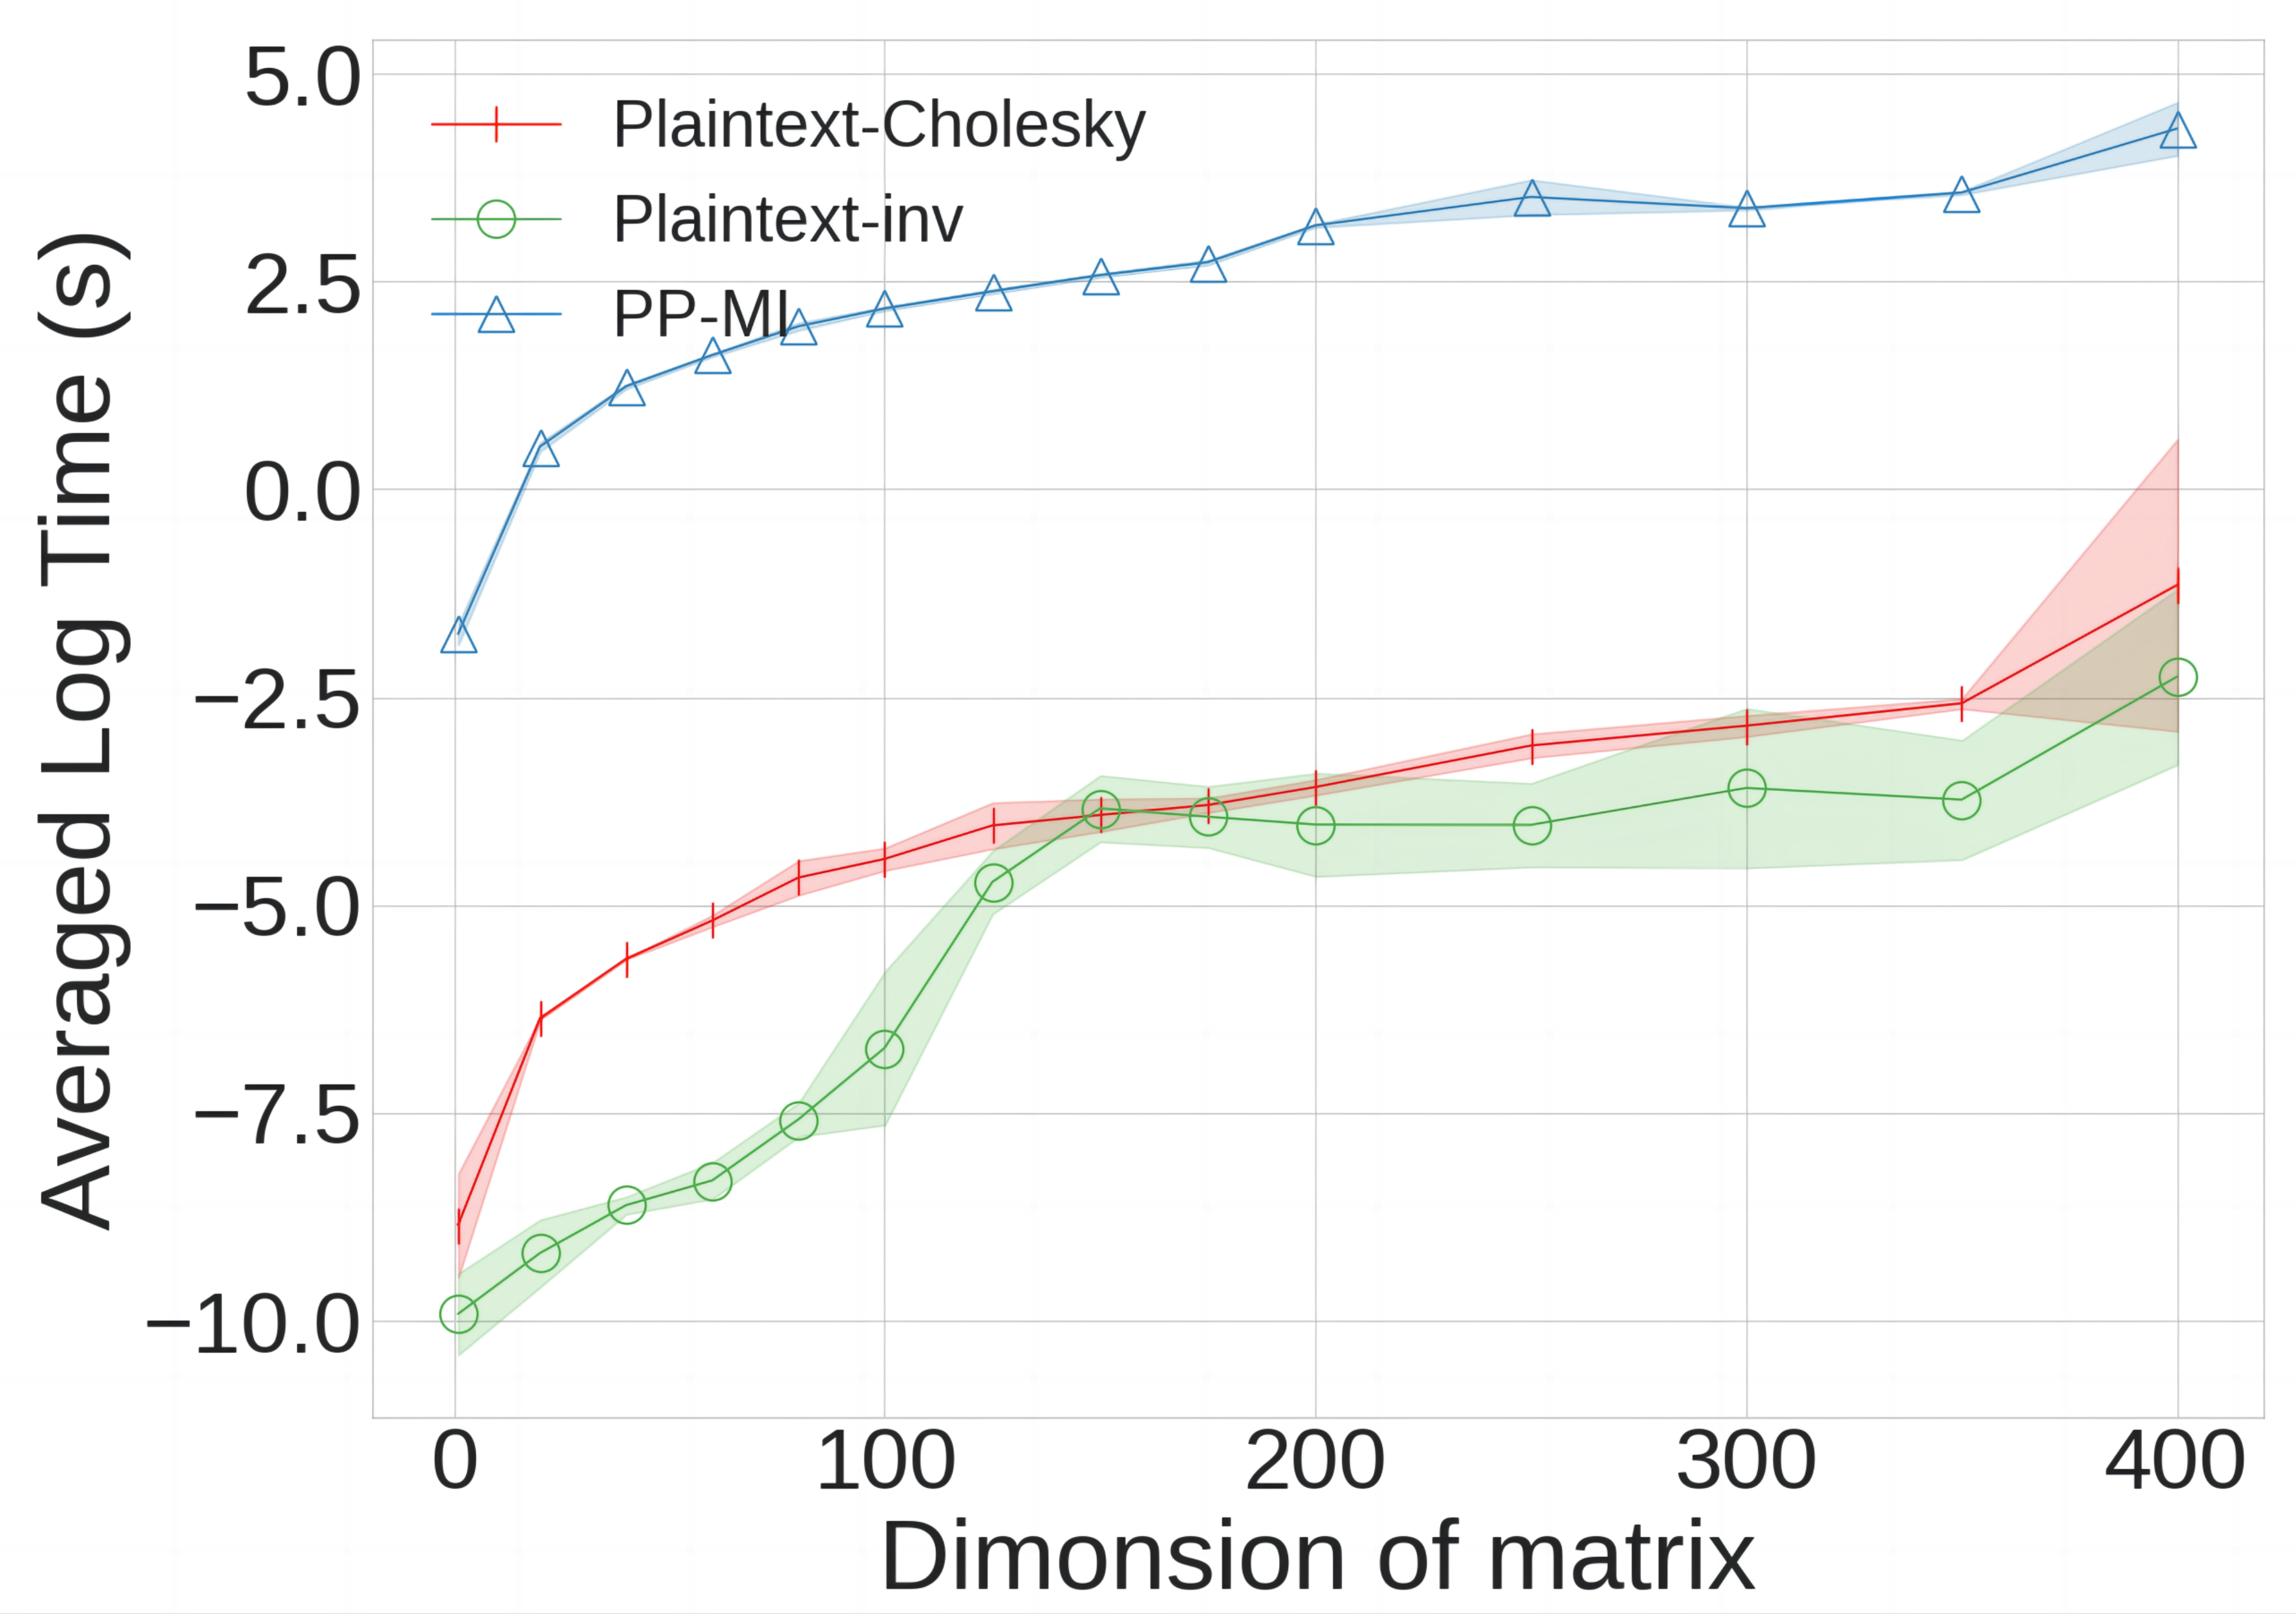

Supplement: supplementary_material [file attachment]

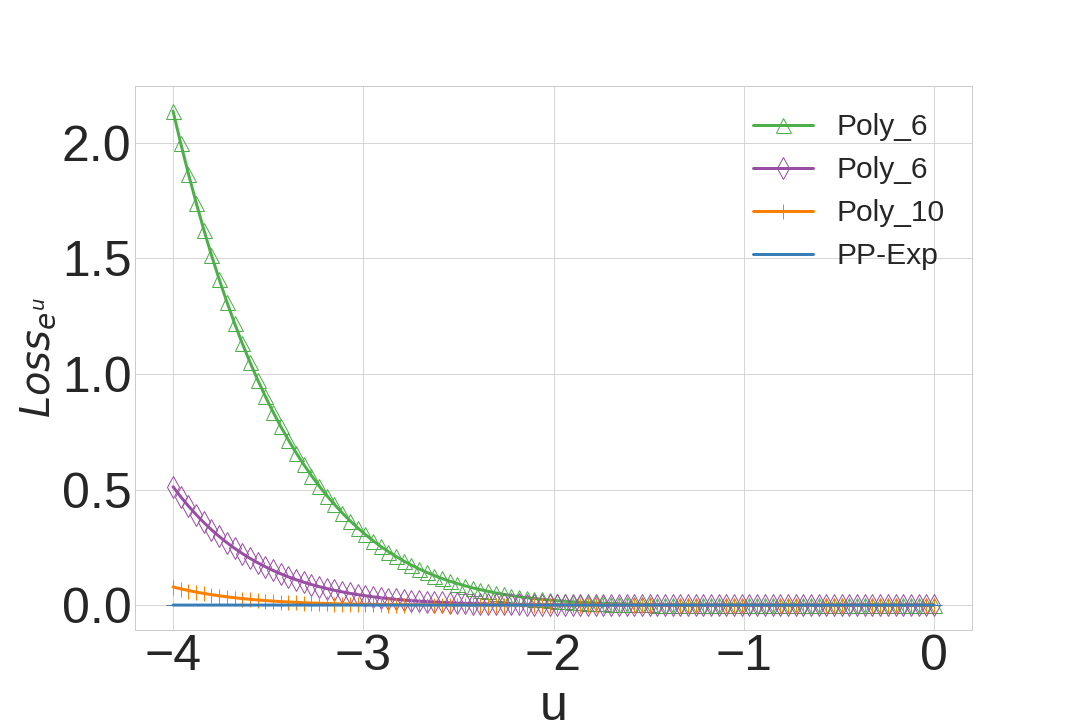

Supplement: supplementary_material [file attachment]

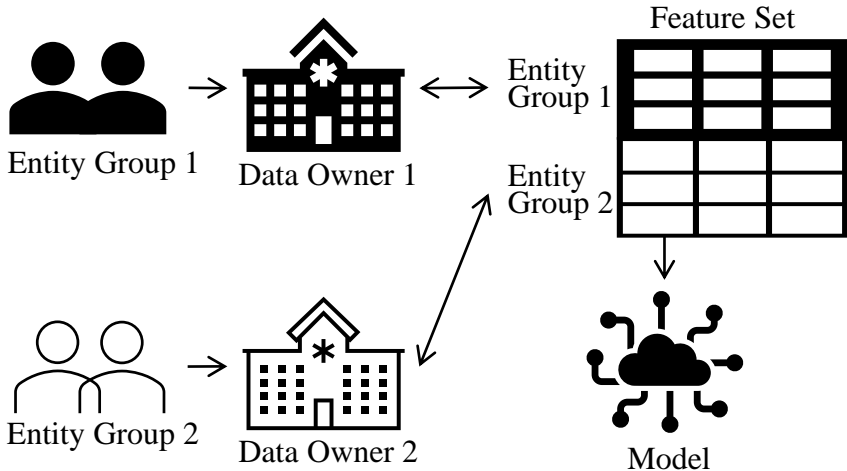

Supplement: supplementary_material [file attachment]

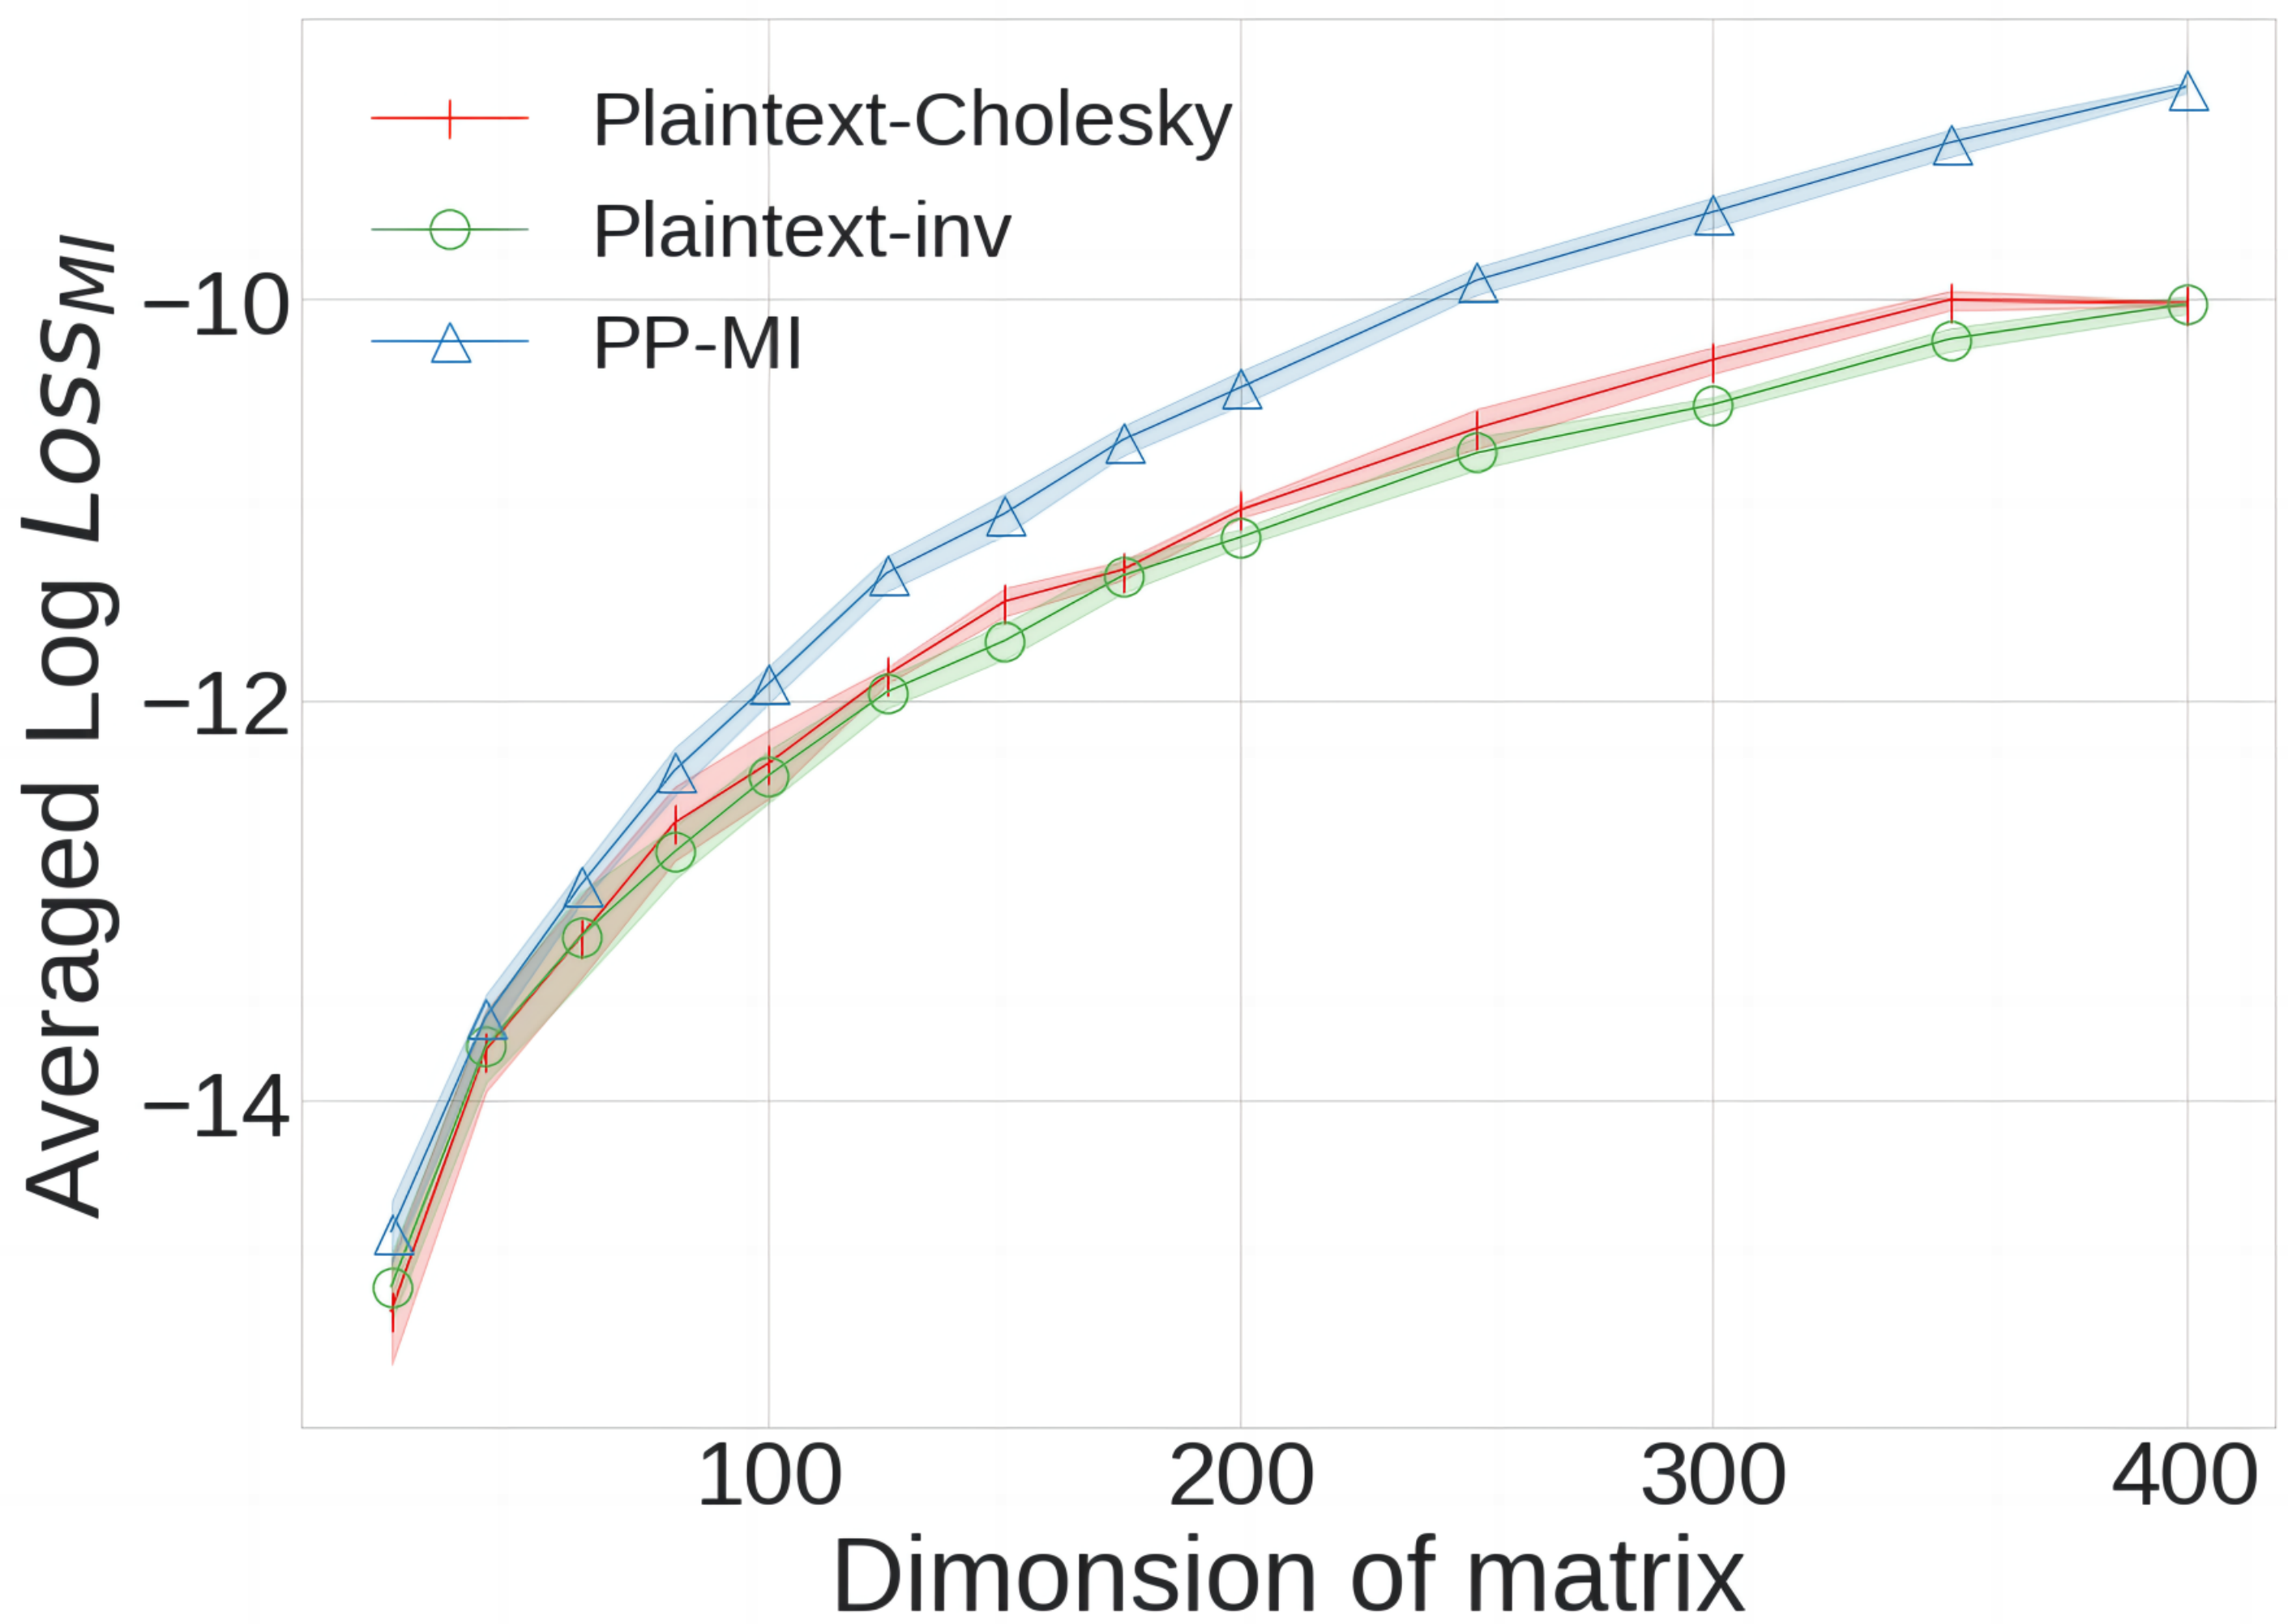

Supplement: supplementary_material [file attachment]

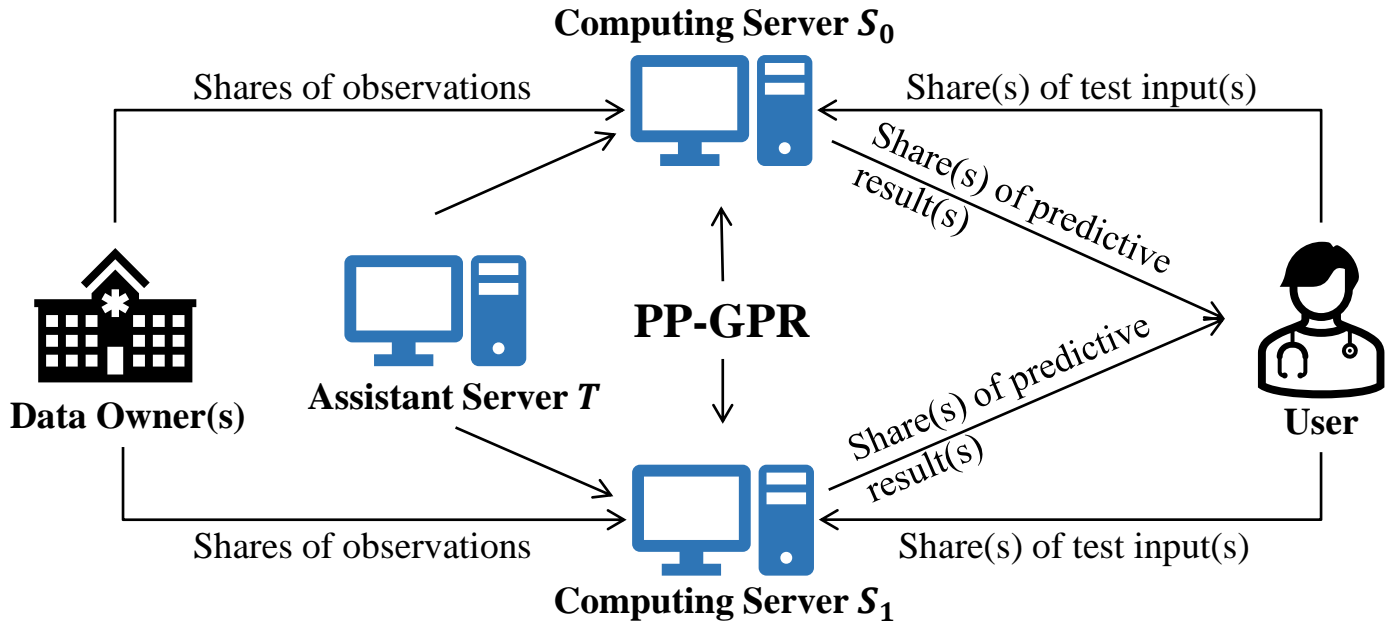

Supplement: supplementary_material [file attachment]

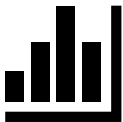

User  
Data 1

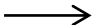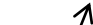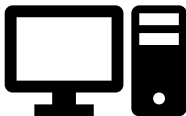

Model Owner

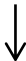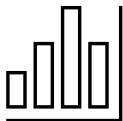

User  
Data 2

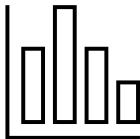

Prediction Result

Supplement: supplementary_material [file attachment]
